# Supplementary material for: Association between Fruit Consumption and Lipid Profile among Children and Adolescents: A National Cross-Sectional Study in China
Source: MDPI journal article supplement (doi:10.3390/nu14010063), 2021-12-24
Supplement: s1 [file s1]

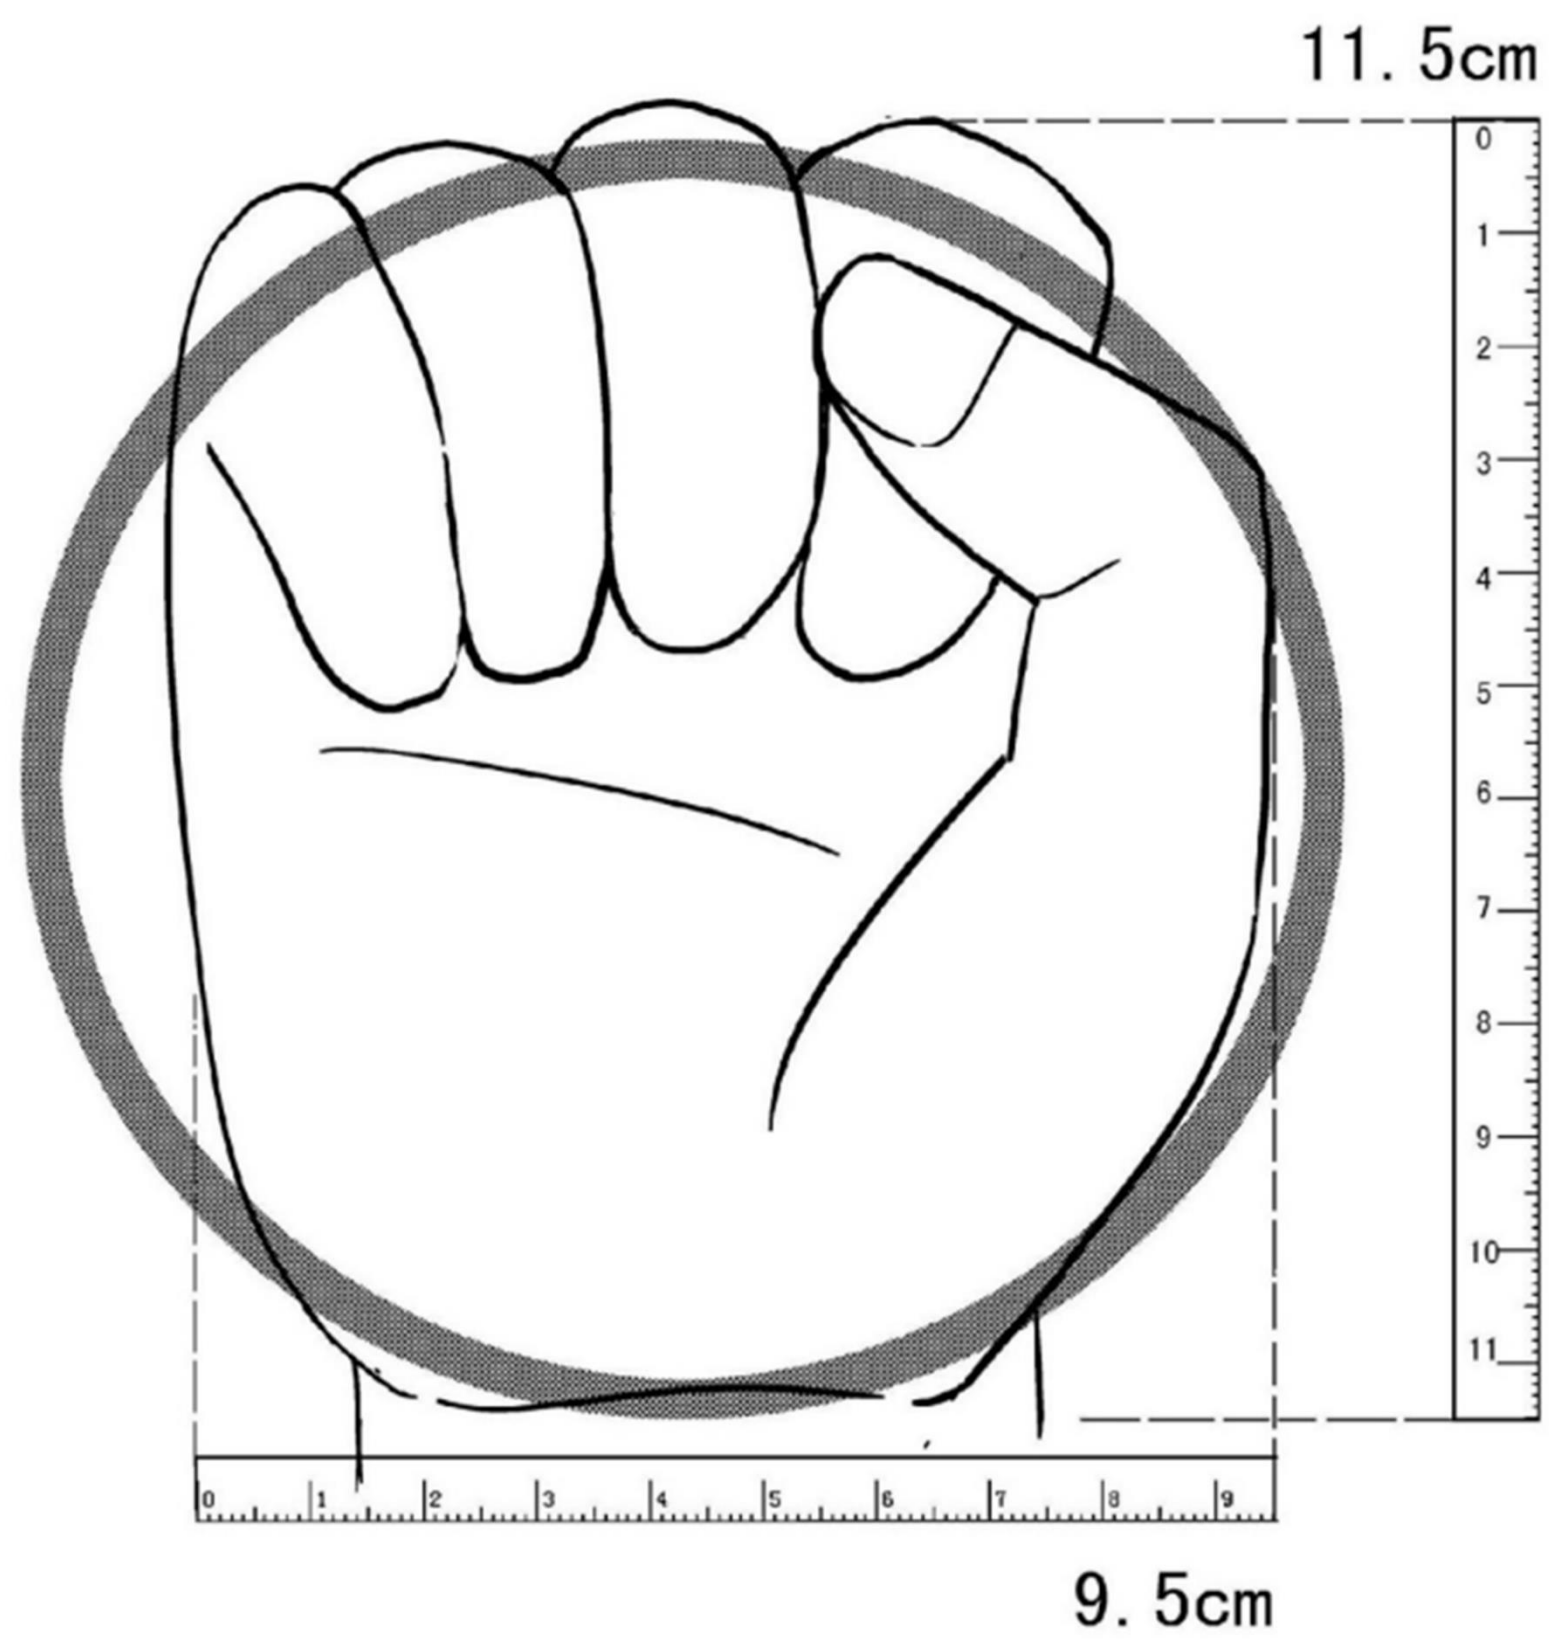

**Figure S1.** The size of one serving of fruit or vegetable (as the size of a fist of ordinary adult).

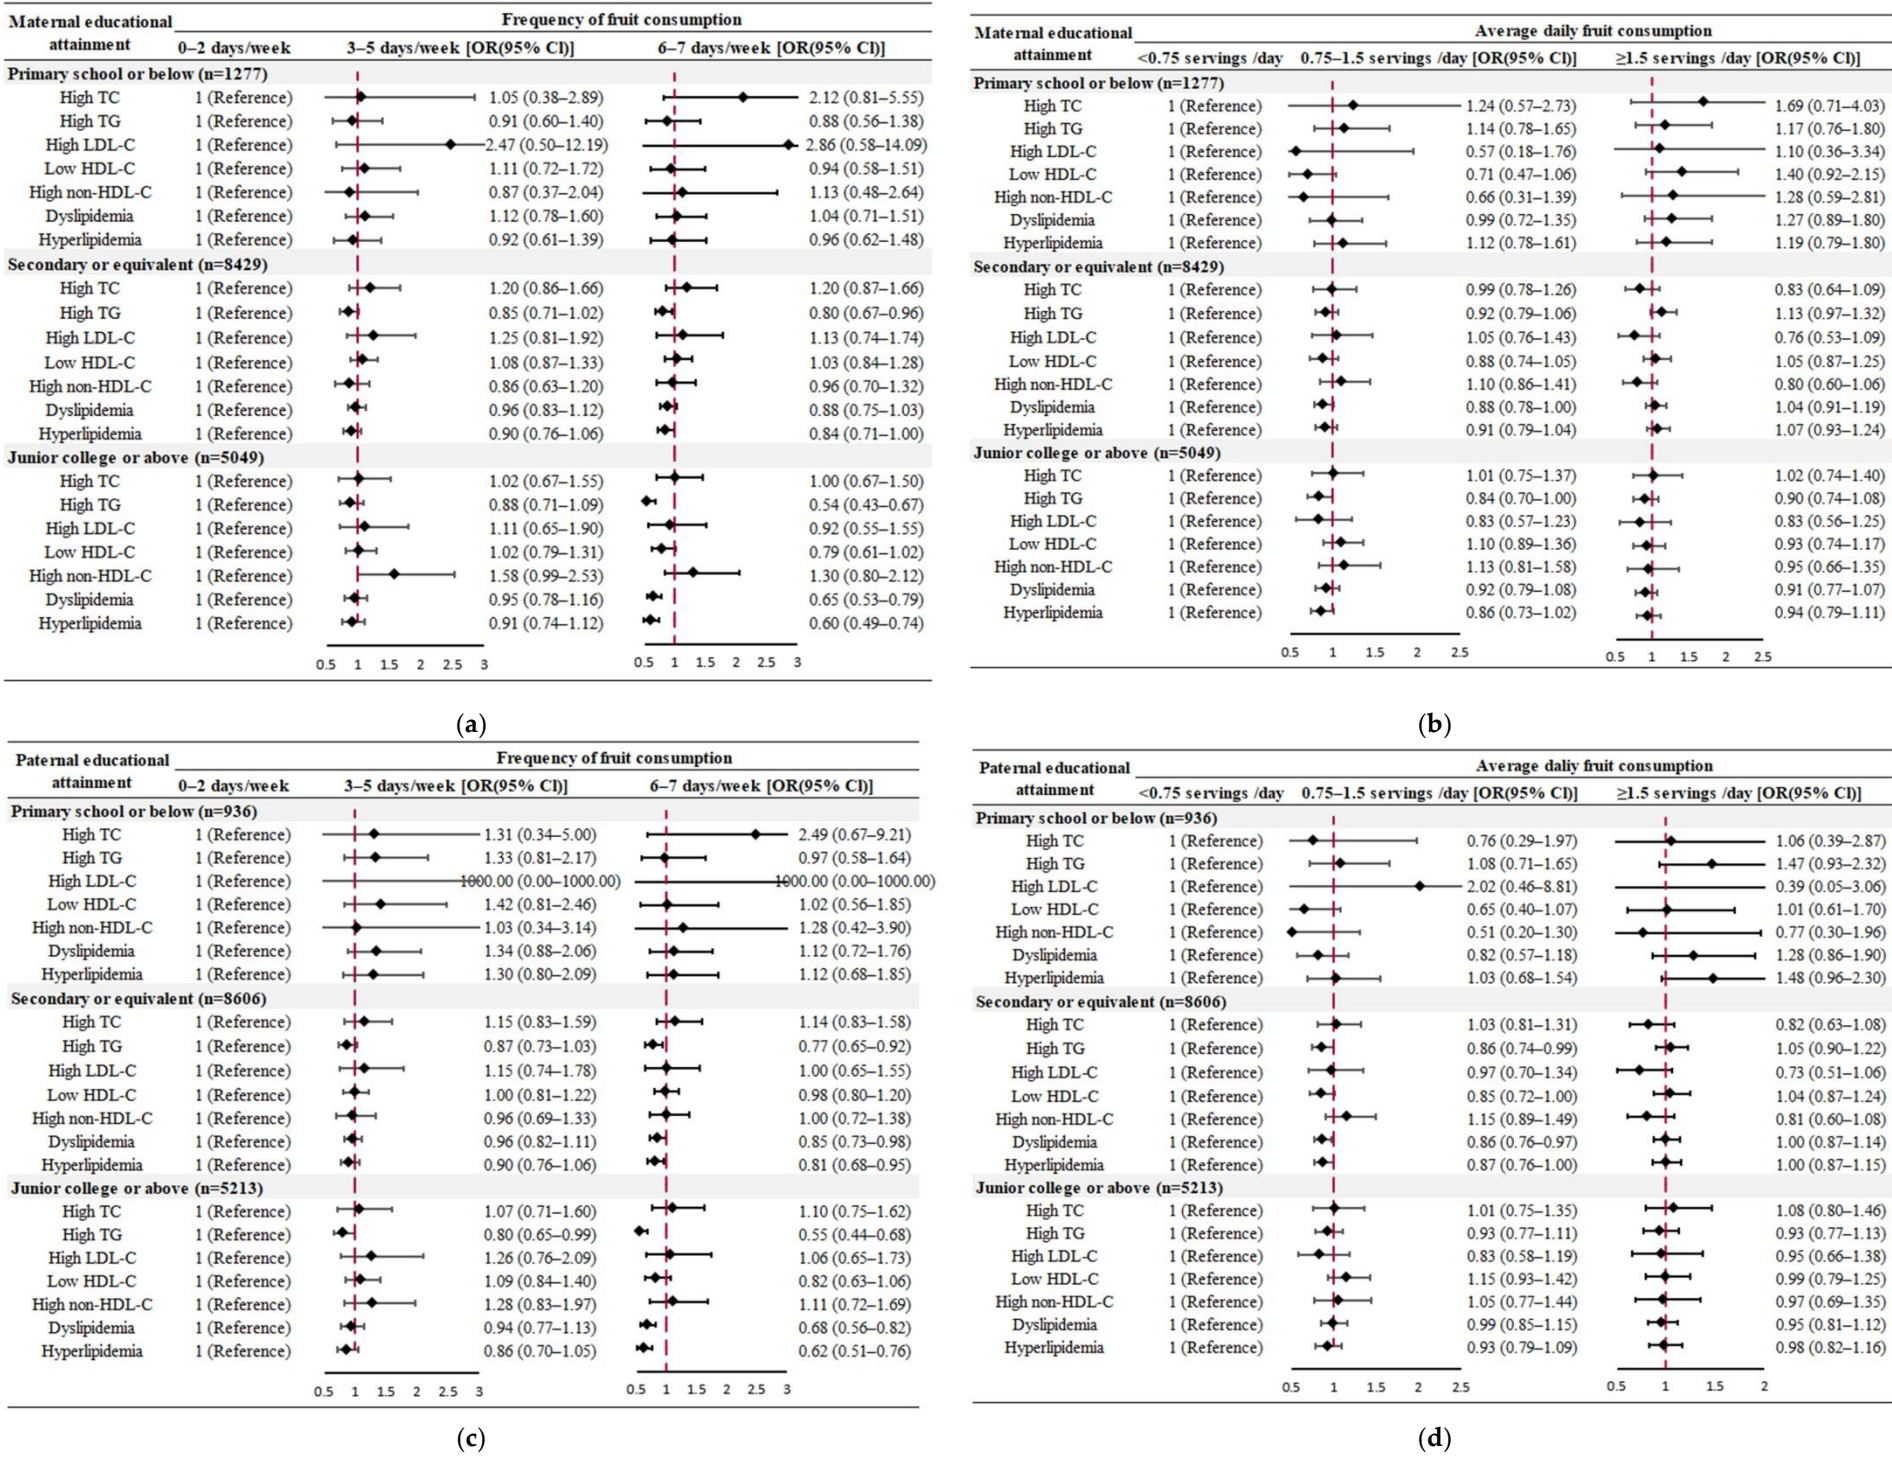

**Figure S2.** Parental educational attainment-specific analysis of the associations between fruit consumption and lipid profile (adjusted for age, residence area, sex, BMI values, ethnicity, incomes, parental weight, vegetable consumption, sugar-sweetened beverages consumption, meat consumption and physical activity) **(a)** Maternal educational attainment-specific analysis for frequency consumption; **(b)** Maternal educational attainment-specific analysis for average daily consumption; **(c)** Paternal educational attainment-specific analysis for frequency consumption; **(d)** Paternal educational attainment-specific analysis for average daily consumption. TC, total cholesterol; TG, triglycerides; LDL-C, low density lipoprotein-cholesterol; HDL-C, high density lipoprotein-cholesterol; diamond symbol, point estimates; red dashed lines, invalid line.

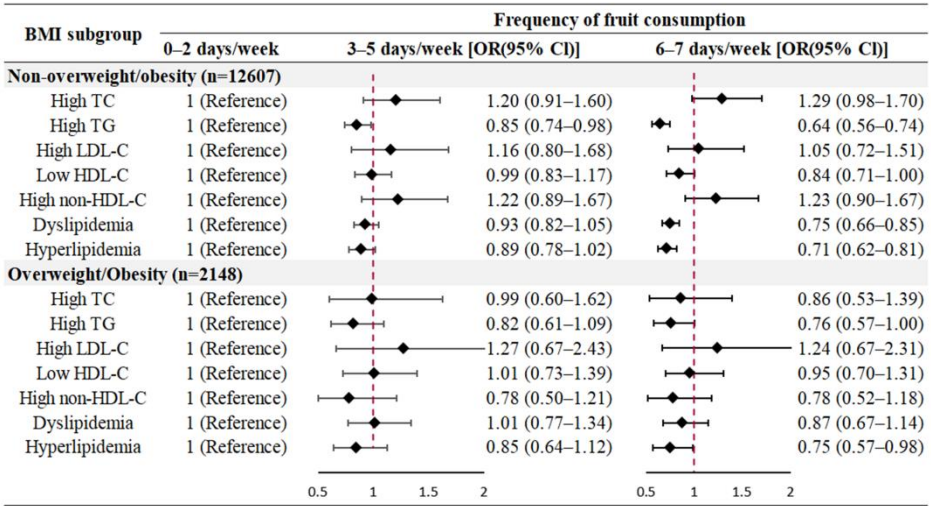

(a)

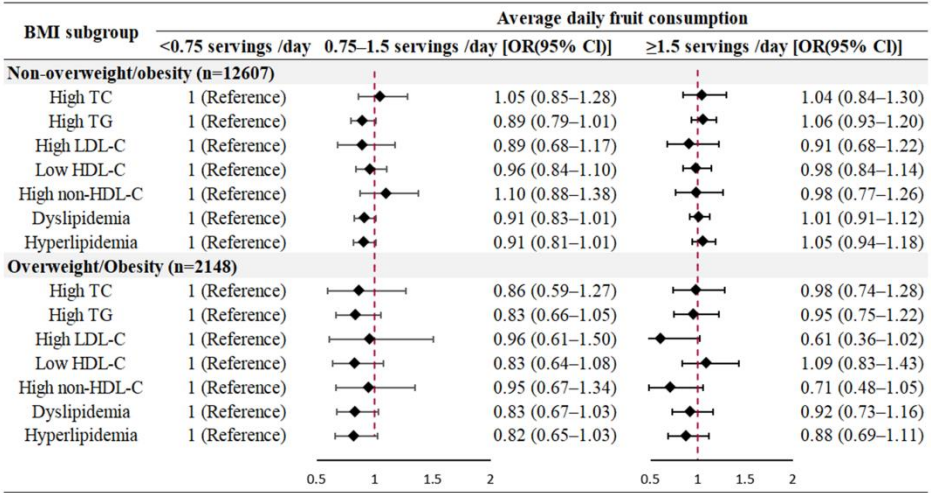

(b)

**Figure S3.** BMI-specific analysis of the associations between fruit consumption and lipid profile (adjusted for age, residence area, sex, ethnicity, incomes, parental weight, parental educational attainment, vegetable consumption, sugar-sweetened beverages consumption, meat consumption and physical activity) (a) BMI-specific analysis for frequency consumption; (b) BMI-specific analysis for average daily consumption. TC, total cholesterol; TG, triglycerides; LDL-C, low density lipoprotein-cholesterol; HDL-C, high density lipoprotein-cholesterol; diamond symbol, point estimates; red dashed lines, invalid line.



| Table S1. Prevalence of the abnormal lipid profile (n, %). |                                |               |               |                                                                 |                                 |                        |                    |                                                 |
|------------------------------------------------------------|--------------------------------|---------------|---------------|-----------------------------------------------------------------|---------------------------------|------------------------|--------------------|-------------------------------------------------|
| Lipid profile                                              | Frequency of fruit consumption |               |               | Significant group comparisons*                                  | Average daily fruit consumption |                        |                    |                                                 |
|                                                            | 0–2 days/week                  | 3–5 days/week | 6–7 days/week |                                                                 | <0.75 servings /day             | 0.75–1.5 servings /day | ≥1.5 servings /day | Significant group comparisons*                  |
| <b>Total (n=14755)</b>                                     | n=2228                         | n=5698        | n=6829        |                                                                 | n=4791                          | n=5432                 | n=4532             |                                                 |
| High TC                                                    | 100 (4.49%)                    | 294 (5.16%)   | 407 (5.96%)   | NS                                                              | 255 (5.32%)                     | 303 (5.58%)            | 243 (5.36%)        | NS                                              |
| High TG                                                    | 526 (23.61%)                   | 1226 (21.52%) | 1311 (19.20%) | 0–2 days/week > 6–7 days/week;<br>3–5 days/week > 6–7 days/week | 990 (20.66%)                    | 1050 (19.33%)          | 1023 (22.57%)      | over 1.5 servings /day > 0.75–1.5 servings /day |
| High LDL-C                                                 | 55 (2.47%)                     | 170 (2.98%)   | 224 (3.28%)   | NS                                                              | 150 (3.13%)                     | 166 (3.06%)            | 133 (2.93%)        | NS                                              |
| Low HDL-C                                                  | 330 (14.81%)                   | 779 (13.67%)  | 835 (12.23%)  | 0–2 days/week > 6–7 days/week                                   | 650 (13.57%)                    | 675 (12.43%)           | 619 (13.66%)       | NS                                              |
| High non-HDL-C                                             | 97 (4.35%)                     | 256 (4.49%)   | 347 (5.08%)   | NS                                                              | 222 (4.63%)                     | 275 (5.06%)            | 203 (4.48%)        | NS                                              |
| Dyslipidemia                                               | 751 (33.71%)                   | 1877 (32.94%) | 2064 (30.22%) | 0–2 days/week > 6–7 days/week;<br>3–5 days/week > 6–7 days/week | 1528 (31.89%)                   | 1650 (30.38%)          | 1514 (33.41%)      | over 1.5 servings /day > 0.75–1.5 servings /day |
| Hyperlipidemia                                             | 592 (26.57%)                   | 1437 (25.22%) | 1592 (23.31%) | 0–2 days/week > 6–7 days/week                                   | 1169 (24.40%)                   | 1256 (23.12%)          | 1196 (26.39%)      | over 1.5 servings /day > 0.75–1.5 servings /day |
| <b>Boys (n=7420)</b>                                       | n=1312                         | n=2882        | n=3226        |                                                                 | n=2504                          | n=2658                 | n=2258             |                                                 |
| High TC                                                    | 51 (3.89%)                     | 151 (5.24%)   | 162 (5.02%)   | NS                                                              | 120 (4.79%)                     | 144 (5.42%)            | 100 (4.43%)        | NS                                              |
| High TG                                                    | 270 (20.58%)                   | 568 (19.71%)  | 569 (17.64%)  | NS                                                              | 457 (18.25%)                    | 467 (17.57%)           | 483 (21.39%)       | over 1.5 servings /day > 0.75–1.5 servings /day |
| High LDL-C                                                 | 29 (2.21%)                     | 81 (2.81%)    | 92 (2.85%)    | NS                                                              | 65 (2.60%)                      | 82 (3.09%)             | 55 (2.44%)         | NS                                              |
| Low HDL-C                                                  | 212 (16.16%)                   | 418 (14.50%)  | 421 (13.05%)  | NS                                                              | 364 (14.54%)                    | 345 (12.98%)           | 342 (15.15%)       | NS                                              |
| High non-HDL-C                                             | 53 (4.04%)                     | 132 (4.58%)   | 148 (4.59%)   | NS                                                              | 106 (4.23%)                     | 137 (5.15%)            | 90 (3.99%)         | NS                                              |
| Dyslipidemia                                               | 416 (31.71%)                   | 920 (31.92%)  | 928 (28.77%)  | NS                                                              | 754 (30.11%)                    | 773 (29.08%)           | 737 (32.64%)       | NS                                              |
| Hyperlipidemia                                             | 301 (22.94%)                   | 676 (23.46%)  | 680 (21.08%)  | NS                                                              | 536 (21.41%)                    | 572 (21.52%)           | 549 (24.31%)       | NS                                              |
| <b>Girls (n=7335)</b>                                      | n=916                          | n=2816        | n=3603        |                                                                 | n=2287                          | n=2774                 | n=2274             |                                                 |
| High TC                                                    | 49 (5.35%)                     | 143 (5.08%)   | 245 (6.80%)   | 6–7 days/week > 3–5 days/week                                   | 135 (5.90%)                     | 159 (5.73%)            | 143 (6.29%)        | NS                                              |
| High TG                                                    | 256 (27.95%)                   | 658 (23.37%)  | 742 (20.59%)  | 0–2 days/week > 3–5 days/week;<br>0–2 days/week > 6–7 days/week | 533 (23.31%)                    | 583 (21.02%)           | 540 (23.75%)       | NS                                              |
| High LDL-C                                                 | 26 (2.84%)                     | 89 (3.16%)    | 132 (3.66%)   | NS                                                              | 85 (3.72%)                      | 84 (3.03%)             | 78 (3.43%)         | NS                                              |
| Low HDL-C                                                  | 118 (12.88%)                   | 361 (12.82%)  | 414 (11.49%)  | NS                                                              | 286 (12.51%)                    | 330 (11.90%)           | 277 (12.18%)       | NS                                              |
| High non-HDL-C                                             | 44 (4.80%)                     | 124 (4.40%)   | 199 (5.52%)   | NS                                                              | 116 (5.07%)                     | 138 (4.97%)            | 113 (4.97%)        | NS                                              |
| Dyslipidemia                                               | 335 (36.57%)                   | 957 (33.98%)  | 1136 (31.53%) | 0–2 days/week > 6–7 days/week                                   | 774 (33.84%)                    | 877 (31.61%)           | 777 (34.17%)       | NS                                              |
| Hyperlipidemia                                             | 291 (31.77%)                   | 761 (27.02%)  | 912 (25.31%)  | 0–2 days/week > 3–5 days/week;<br>0–2 days/week > 6–7 days/week | 633 (27.68%)                    | 684 (24.66%)           | 647 (28.45%)       | over 1.5 servings /day > 0.75–1.5 servings /day |

\*Chi-square tests with Holm Bonferroni correction was used to account for multiple comparisons. TC, total cholesterol; TG, triglycerides; LDL-C, low density lipoprotein-cholesterol; HDL-C, high density lipoprotein-cholesterol

| Table S2. Difference of demographics and lifestyle behaviors among age groups. |                           |                             |                             |         |
|--------------------------------------------------------------------------------|---------------------------|-----------------------------|-----------------------------|---------|
| Characteristics and behaviors                                                  | 5–9 years old<br>(n=5646) | 10–14 years old<br>(n=5776) | 15–19 years old<br>(n=3333) | P-value |
| BMI, kg/m²                                                                     | 16.78±3.02                | 19.26±3.64                  | 21.18±3.80                  | <0.0001 |
| Boys (n,%)                                                                     | 2814 (49.84%)             | 2999 (51.92%)               | 1607 (48.21%)               | 0.002   |
| Residence area (n,%)                                                           |                           |                             |                             | 0.004   |
| Urban                                                                          | 2935 (51.98%)             | 3175 (54.97%)               | 1750 (52.51%)               |         |
| Rural                                                                          | 2711 (48.02%)             | 2601 (45.03%)               | 1583 (47.49%)               |         |
| Frequency of consumption (days per week)                                       |                           |                             |                             |         |
| Fruit                                                                          | 5.10±2.04                 | 4.97±2.10                   | 4.58±2.22                   | <0.0001 |
| Vegetables                                                                     | 6.06±1.77                 | 5.96±1.87                   | 6.07±1.81                   | 0.002   |
| Sugar-sweetened beverages                                                      | 1.26±1.47                 | 1.65±1.77                   | 2.21±2.10                   | <0.0001 |
| Meat                                                                           | 4.93±2.24                 | 4.79±2.27                   | 5.51±2.08                   | <0.0001 |
| Average daily consumption (servings per day)                                   |                           |                             |                             |         |
| Fruit                                                                          | 1.30±1.09                 | 1.45±1.22                   | 1.15±1.04                   | <0.0001 |
| Vegetables                                                                     | 1.73±1.34                 | 2.05±1.64                   | 1.80±1.46                   | <0.0001 |
| Sugar-sweetened beverages                                                      | 0.31±0.61                 | 0.51±0.94                   | 0.62±0.92                   | <0.0001 |
| Meat                                                                           | 1.09±1.14                 | 1.32±1.43                   | 1.34±1.32                   | <0.0001 |
| Frequency of physical activity, day                                            | 3.04±2.48                 | 3.60±2.53                   | 3.41±2.56                   | <0.0001 |
| Average daily physical activity, hours and minutes                             | 0.38±0.81                 | 0.39±0.83                   | 0.30±0.83                   | <0.0001 |

Abbreviation: BMI, body mass index.
